# Supplementary material for: Facile synthesis of water soluble fluorescent metal (Pt, Au, Ag and Cu) quantum clusters for the selective detection of Fe3+ions as both fluorescent and colorimetric probes
Source: Royal Society of Chemistry journal article supplement (doi:10.1039/c6tc05253c), 2017-01-01
Supplement: c6tc05253c1.pdf [file c6tc05253c1.pdf]

### Supplementary Information

## **Facile synthesis of water soluble fluorescent metal (Pt, Au, Ag and Cu) quantum clusters for selective detection of Fe<sup>3+</sup> ions as both fluorescent and colorimetric probe**

Shaochen Zhou,<sup>a,b</sup> Mei Zhang,<sup>a,c</sup> Fangyuan Yang,<sup>a,b</sup> Fu Wang<sup>a,\*</sup> and Chuanyi Wang<sup>a,\*</sup>

<sup>a</sup>Laboratory of Environmental Sciences and Technology, Xinjiang Technical Institute of Physics & Chemistry; Key Laboratory of Functional Materials and Devices for Special Environments, Chinese Academy of Sciences, Urumqi, Xinjiang 830011, China

<sup>b</sup>University of Chinese Academy of Sciences, Beijing 100049, China

<sup>c</sup>College of Chemistry and Chemical Engineering, Xinjiang Normal University, Urumuqi 830054, China

Table S1. Preparation of metal (Pt, Au, Ag, Cu) QCs under different conditions

| Metal quantum clusters | Solution color after blending of reactants | Solution color after reaction | Fluorescence (excited at 365 nm)             | Reaction time (h) | Reaction temperature (°C) |
|------------------------|--------------------------------------------|-------------------------------|----------------------------------------------|-------------------|---------------------------|
| Pt                     | Colorless                                  | Colorless                     | Non-luminescent                              | -                 | 5                         |
|                        |                                            | Pale brown                    | Green light                                  | 96                | 15                        |
|                        |                                            | Pale brown                    | Green light                                  | 24                | 35                        |
|                        |                                            | Puce                          | Green light                                  | 4                 | 65                        |
|                        |                                            | Puce                          | Green light                                  | 1                 | 80                        |
| Au                     | Brownish yellow                            | Pale brown                    | Green light                                  | 8                 | 5                         |
|                        |                                            | Pale brown                    | Green light                                  | 1                 | 15                        |
|                        |                                            | Pale brown                    | Green light(Blue precipitants were observed) | 0.25              | 35                        |
|                        |                                            | Colorless                     | Blue precipitants                            | -                 | 65                        |
|                        |                                            | Colorless                     | Precipitants                                 | -                 | 80                        |
| Ag                     | Brown red                                  | Brown                         | Green light                                  | 120               | 5                         |
|                        |                                            | Puce                          | Green light                                  | 48                | 15                        |
|                        |                                            | Puce                          | Green light                                  | 6                 | 35                        |
|                        |                                            | Puce                          | Green light                                  | 2.5               | 65                        |
|                        |                                            | Puce                          | Green light                                  | 0.5               | 80                        |
| Cu                     | Pale blue                                  | Brown                         | Green light                                  | 132               | 5                         |
|                        |                                            | Brown                         | Green light                                  | 40                | 15                        |
|                        |                                            | Brown                         | Green light                                  | 4                 | 35                        |
|                        |                                            | Puce                          | Green light                                  | 2                 | 65                        |
|                        |                                            | Puce                          | Green light                                  | 0.5               | 80                        |

Table S2. Excitation and emission peaks ( $\lambda_{\text{ex}}/\lambda_{\text{em}}$ ), average PL lifetimes ( $\tau_{\text{avg}}$ ), QYs, average diameters ( $d_{\text{avg}}$ ) and magic numbers (N) of the as-prepared metal QCs.

| Metal QCs | $\lambda_{\text{ex}}/\lambda_{\text{em}}$ (nm) | $\tau_{\text{avg}}$ (ns) | QY (%) |
|-----------|------------------------------------------------|--------------------------|--------|
| Pt        | 352/480                                        | 7.39                     | 2.93   |
| Au        | 401/495                                        | 6.60                     | 13.10  |
| Ag        | 370/468                                        | 4.08                     | 6.97   |
| Cu        | 375/460                                        | 4.59                     | 8.29   |

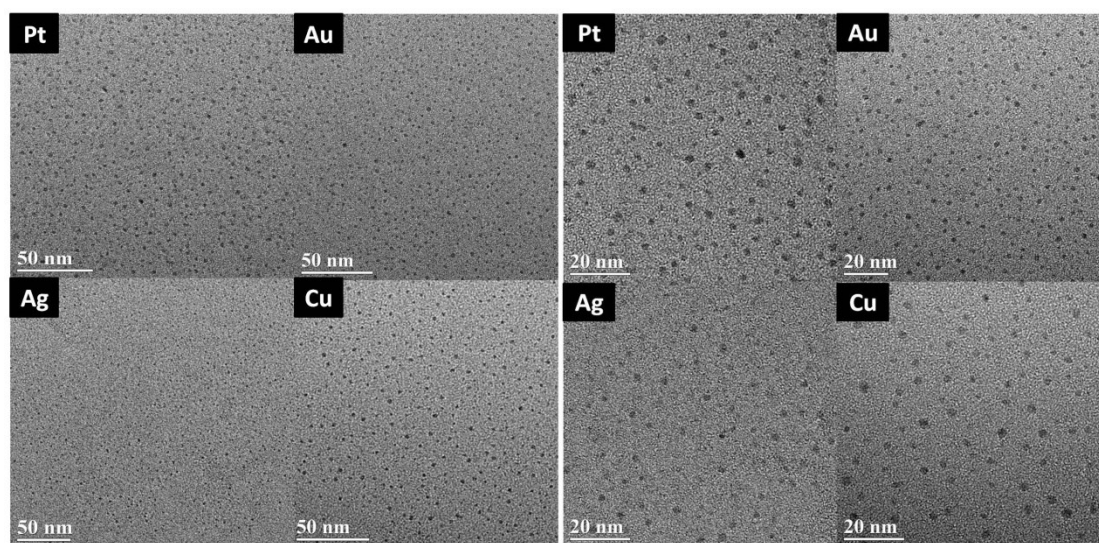

Figure S1. HR-TEM images of the as-synthesized metal (Pt, Au, Ag and Cu) clusters in two different scale bars (50 nm and 20 nm).

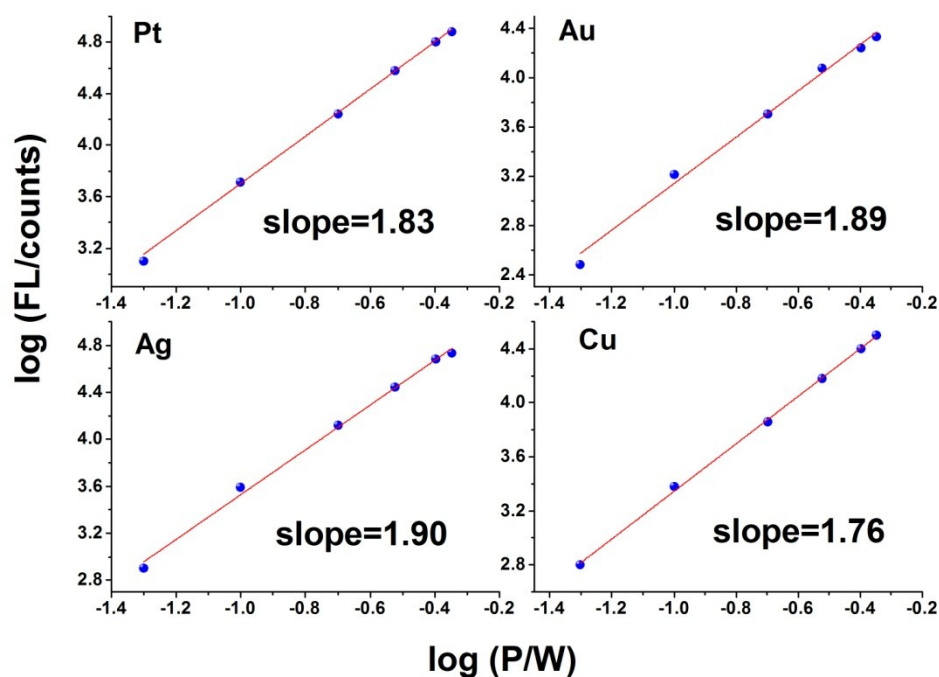

Figure S2. Plots of logarithmic fluorescence intensity ( $\log(FL)$ ) excited by femtosecond laser at 812 nm with the variation in logarithmic pump power ( $\log(P)$ ).

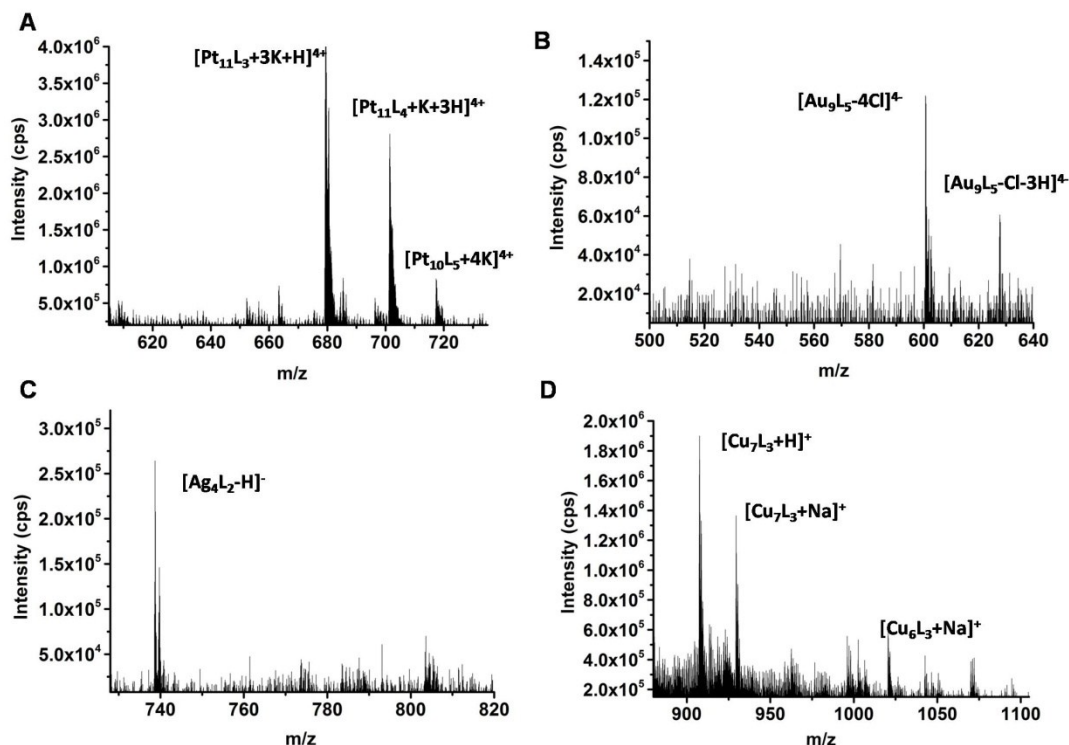

Figure S3. ESI-MS spectra of histidine-capped Pt (A), Au (B), Ag (C) and Cu (D) QCs.

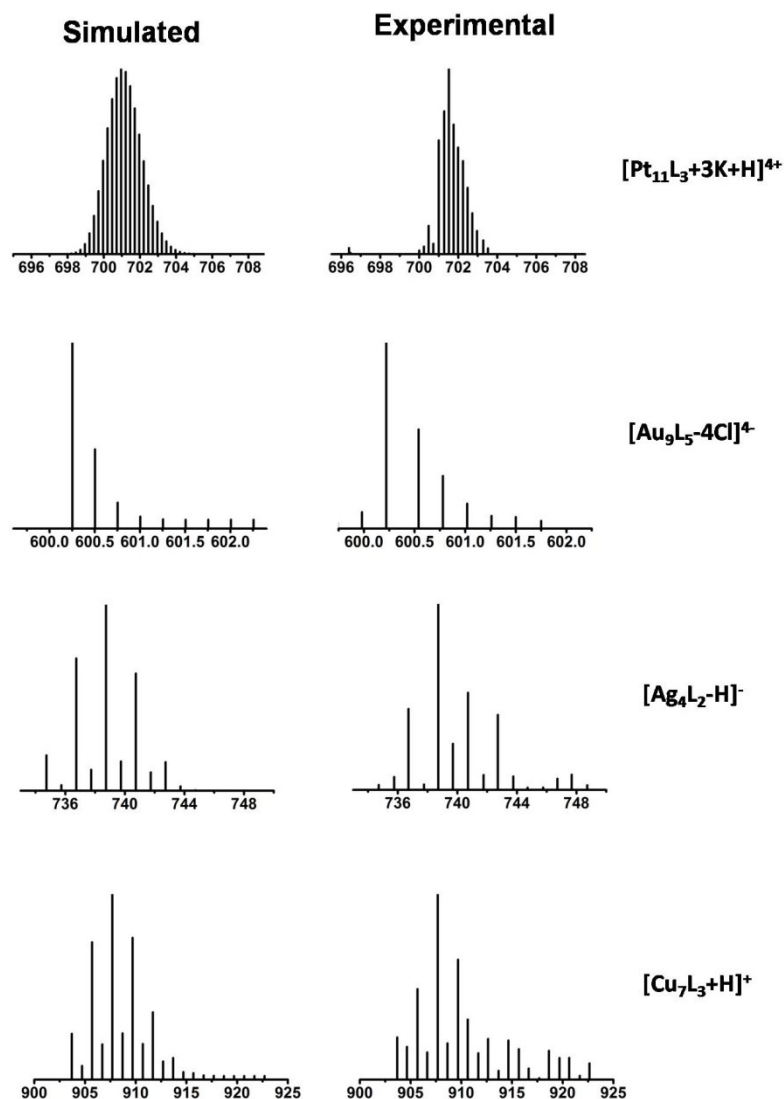

Figure S4. Comparison between experimental and simulated results of ESI-MS spectra

Table S3. Emission energies of the as-prepared metal QCs ( $E_{em}$ ), Fermi energies of bulk metal ( $E_f$ ), calculated and actual metal core numbers ( $N$ ) of metal clusters according to experimental results.

| Metal QCs | $E_{em}$ (eV) | $E_f$ (eV) | $N$ (Calculated) | $N$ (experimental) |
|-----------|---------------|------------|------------------|--------------------|
| Pt        | 2.59          | 5.65       | 10.38            | 11                 |
| Au        | 2.51          | 5.10       | 8.39             | 9                  |
| Ag        | 2.66          | 4.25       | 4.08             | 4                  |
| Cu        | 2.70          | 4.65       | 5.11             | 7                  |

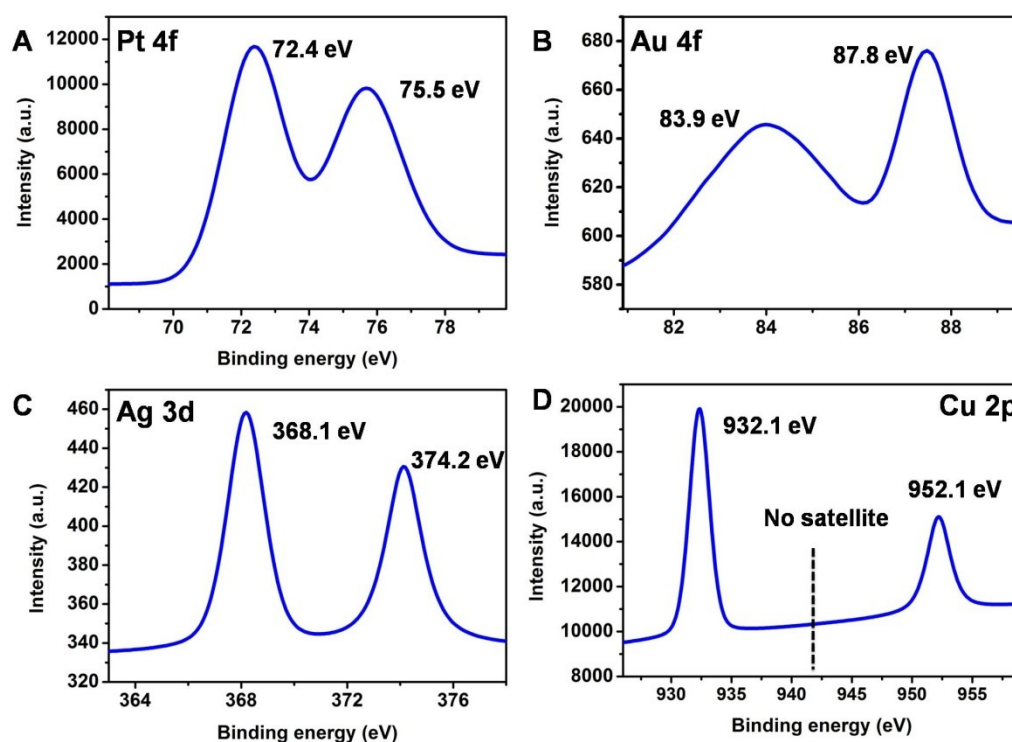

Figure S5. XPS spectra of Pt 4f (A), Au 4f (B), Ag 3d (C) and Cu 2p (D) from the corresponding as-synthesize metal QCs.

Table S4. Binding energies of Pt, Au, Ag and Cu at different valent states

| Element | M (0) |       | M (I) |       | M (II) |       |       |       | M (III) |      |
|---------|-------|-------|-------|-------|--------|-------|-------|-------|---------|------|
|         |       |       |       |       |        |       |       |       |         |      |
| Cu 2p   | 931.9 | 951.8 | 932.7 | 952.2 | 932.8  | 942.1 | 951.2 | 956.0 | -       | -    |
| Au 4f   | 83.8  | 87.6  | 85.1  | 88.5  | 85.6   |       | 88.9  |       | 86.4    | 89.5 |
| Ag 3d   | 368.0 | 374.0 | 370.0 | 376.0 | -      |       | -     |       | -       | -    |
| Pt 4f   | 71.8  | 75.1  | -     | -     | 74.40  |       | 77.60 |       | -       | -    |

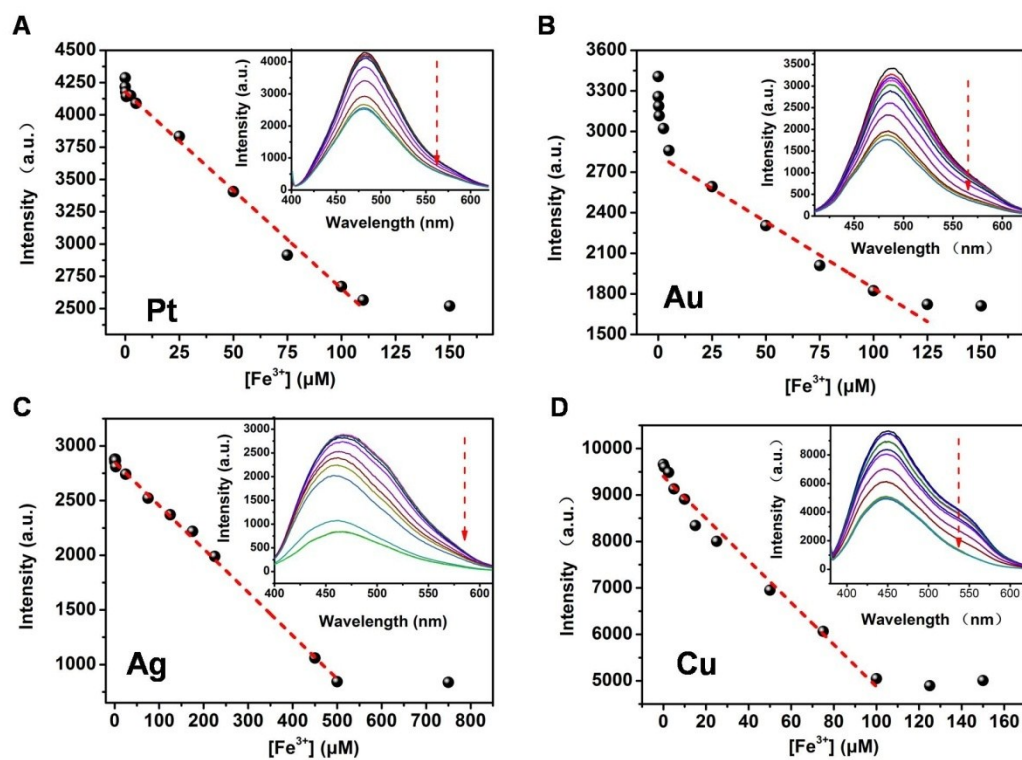

Figure S6. FL spectra of the as-synthesized metal QCs (Pt, Au, Ag, Cu) with the addition of ferric ions.

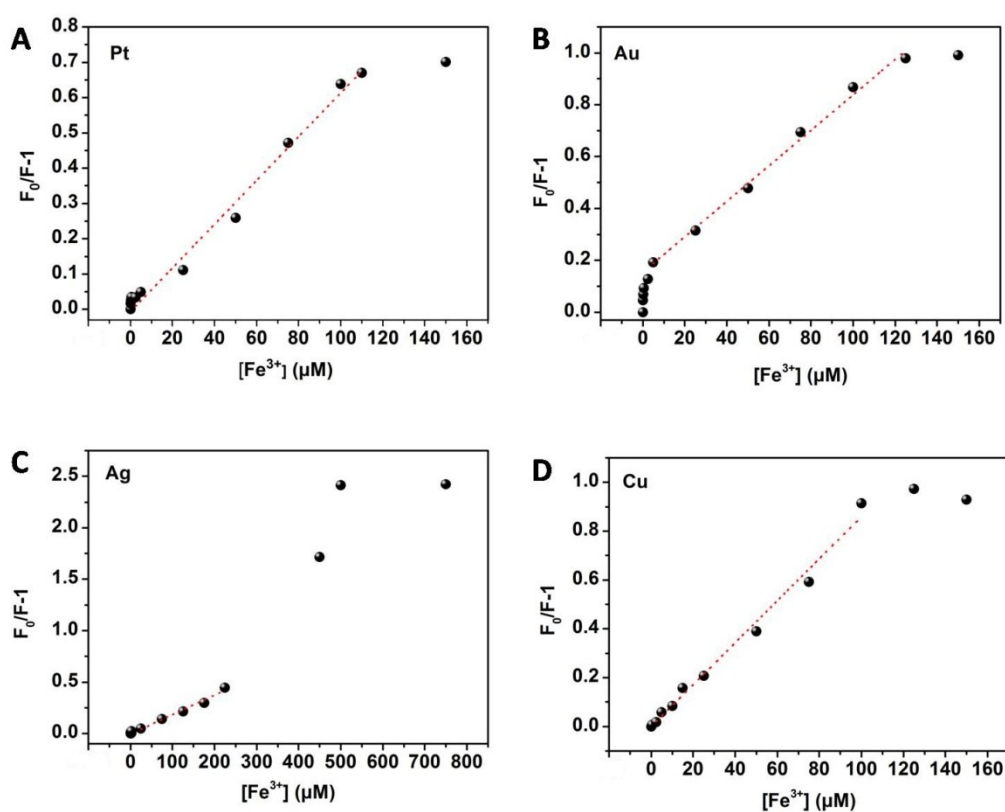

Figure S7. Stern-Volmer plots of the metal (Pt, Au, Ag, Cu) QCs- $\text{Fe}^{3+}$  system.  $K_{\text{sv}}$  values of Pt, Au, Ag, Cu are calculated to be  $6.2 \times 10^3$ ,  $6.84 \times 10^3$ ,  $1.9 \times 10^3$  and  $8.6 \times 10^3 \text{ L} \cdot \text{mol}^{-1}$ .

Table S5. Quantum yields (QYs) of the metal QCs before and after the addition of ferric ions.

| Sample | QY (before) | QY (after) |
|--------|-------------|------------|
| Pt     | 2.93 %      | 1.46 %     |
| Au     | 13.10 %     | 5.73 %     |
| Ag     | 6.97 %      | 1.76 %     |
| Cu     | 8.29 %      | 3.76 %     |



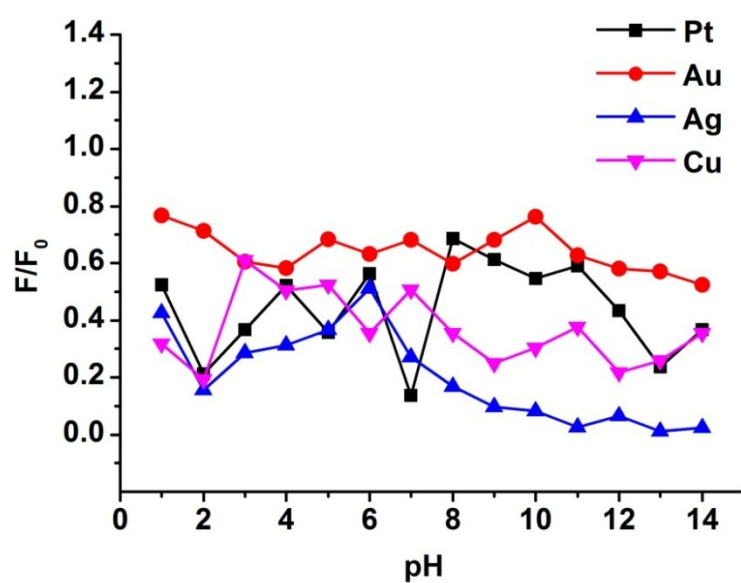

Figure S8. Quenching effect by  $\text{Fe}^{3+}$  at different pH values.  $\text{Fe}^{3+}$  ions are added to the metal QCs solution to reach a concentration of 0.5 mM each time. X axis: pH values of the metal QCs- $\text{Fe}^{3+}$  system. Y axis: ratio of quenched fluorescence intensity (F) versus initial fluorescence intensity ( $F_0$ ) at corresponding pH.

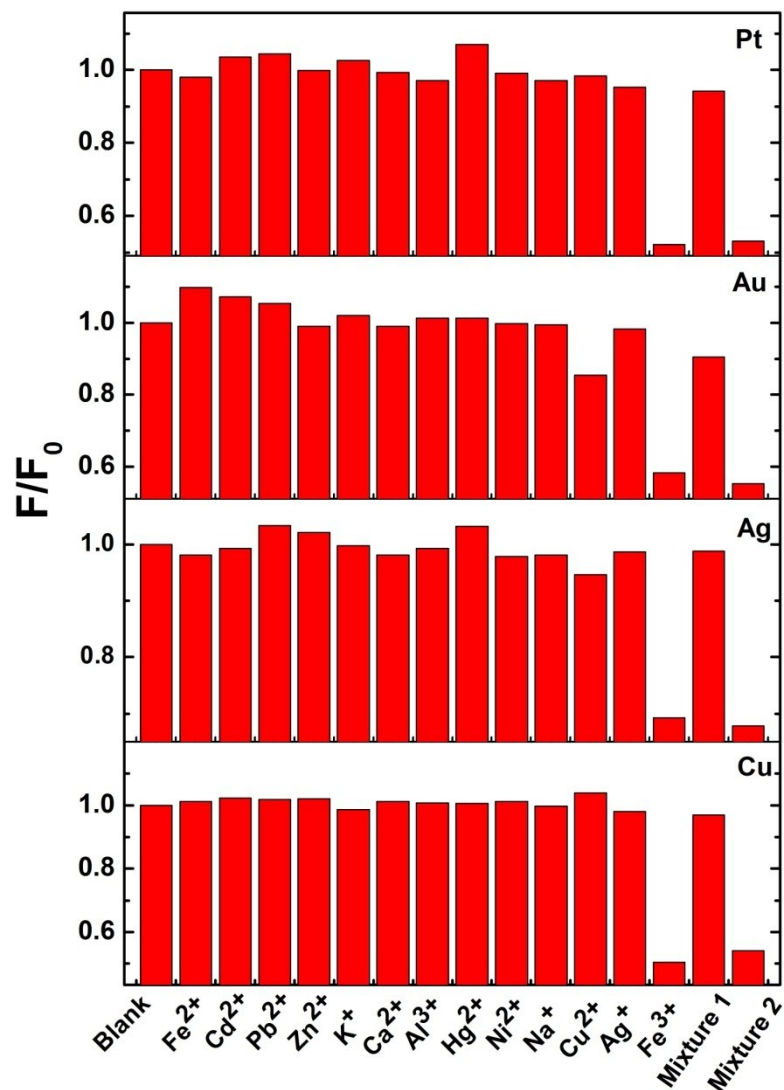

Figure S9. Selectivity and interference tests for the metal (Pt, Au, Ag, Cu) QCs in sensing ferric ions. Mixture 1: system without  $Fe^{3+}$  but other metal ions. Mixture 2: system with all of the metal ions. (Concentration for  $Fe^{3+}$  is 0.1 mM, and for other metal ions is 1 mM )

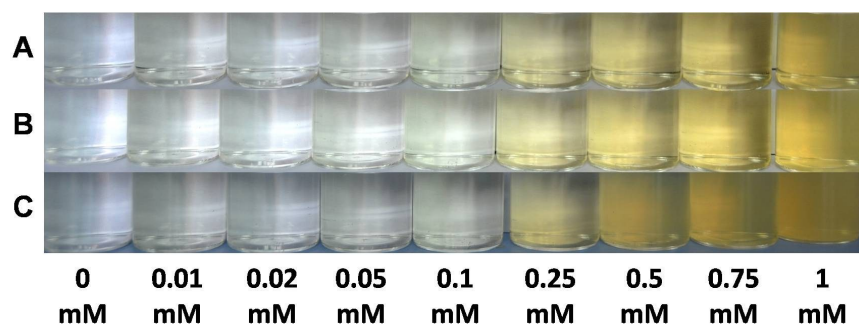

Figure S10. Photographs of the as-synthesized Pt (A), Au (B), Ag (C) QCs solutions with the addition of ferric ions at different concentrations.

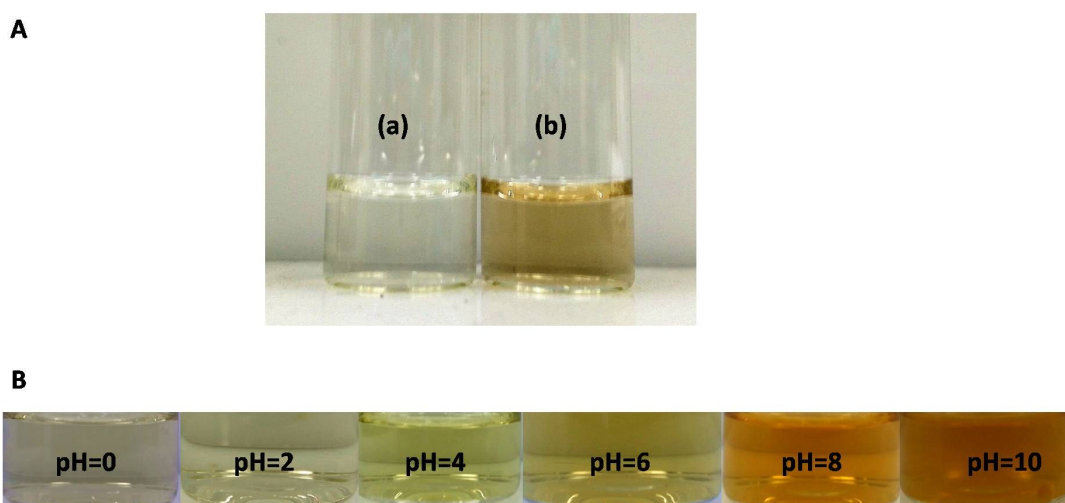

Figure S11. (A) Photographs of  $\text{Fe}^{3+}$  solutions (0.5 mM, pH=4) without (a) and with (b) metal QCs. (B) Photographs of metal QCs- $\text{Fe}^{3+}$  system at different pH values.

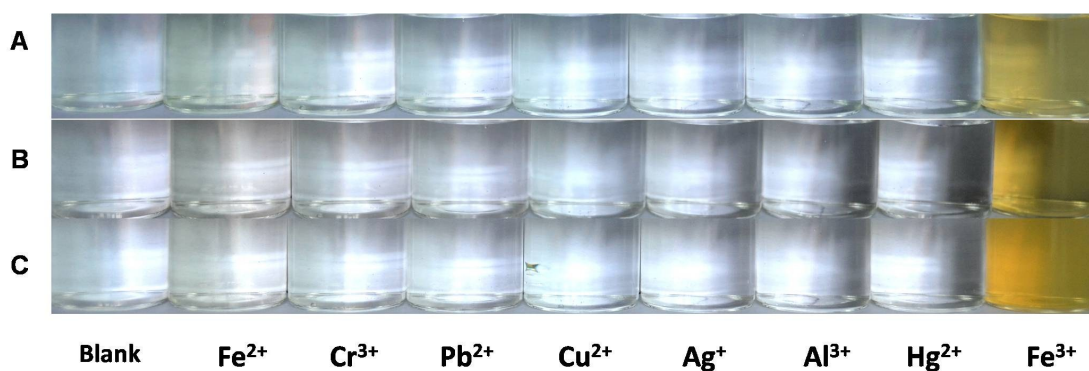

Figure S12. Photographs of the as-synthesized Ag (A), Au (B), Pt (C) QCs solutions with the addition of different metal ions.
